# Supplementary material for: Antimicrobial Peptide Combination Can Hinder Resistance Evolution
Source: PubMed Central journal article supplement (PMC9430149; doi:10.1128/spectrum.00973-22), 2022-07-13
Supplement: spectrum.00973-22-s0001.pdf [file spectrum.00973-22-s0001.pdf]

## Supporting information

Table S1. Antimicrobial peptides sequences and antimicrobial activity against ancestral strain

| <b>AMP</b>        | <b>Sequence</b>                   | <b>MIC (<math>\mu\text{g/ml}</math>)</b> | <b>Purity (%)</b> |
|-------------------|-----------------------------------|------------------------------------------|-------------------|
| <i>Ovispirin</i>  | KNLRRRIIRKIIHIIKKYG               | 50                                       | >97               |
| <i>Aurein 1.2</i> | GLFDIIKKIAESF                     | 50                                       | >92               |
| <i>Melittin</i>   | GIGAVLKVLTTGLPALISWIKRKRQQ        | 6.25                                     | >99               |
| <i>Pexiganan</i>  | GIGKFLKKAKKFGKAFVKILKK            | 12.5                                     | >94               |
| <i>Temporin A</i> | FLPLIGRVLSGIL                     | 6.25                                     | >97               |
| <i>Pardaxin</i>   | GFFALIPKIISSPLFKTLLSAVGSALSSSGGQE | 100                                      | >90               |

Table S2. Minimal inhibitory concentrations (MIC) of the no-peptide selected strain (NPSA)

| <b>AMP</b>              | <b>MIC (<math>\mu\text{g/ml}</math>)</b> |              |              |
|-------------------------|------------------------------------------|--------------|--------------|
|                         | <b>Ancestor</b>                          | <b>Exp.1</b> | <b>Exp.2</b> |
| <b><i>Temporin</i></b>  | 6.25                                     | 6.25         | 6.25         |
| <b><i>Melittin</i></b>  | 6.25                                     | 6.25         | 6.25         |
| <b><i>Pexiganan</i></b> | 12.5                                     | 12.5         | 12.5         |
| <b><i>Pardaxin</i></b>  | 100                                      | 200          | -            |
| <b><i>Ovispirin</i></b> | 50                                       | 25           | -            |
| <b><i>Aurein</i></b>    | 50                                       | 50           | -            |
| <b><i>FK</i></b>        | 100                                      | 100          | 100          |

Table S3. AMP interactions using checkboard assay

| <b>Combination</b>          | <b>Average FIC<sub>i</sub></b> | <b>Min FIC<sub>i</sub></b> |
|-----------------------------|--------------------------------|----------------------------|
| <i>Pexiganan + Melittin</i> | indifference (1.18)            | indifference (1)           |
| <i>Temporin + Melittin</i>  | indifference (1.78)            | indifference (1)           |
| <i>Temporin + Pexiganan</i> | indifference (1.03)            | partial synergy (0.75)     |

Table S4. Statistical test and analysis summary

| Figure    | Test                           | n             | Samples                   | Test value (U/ Z)         | Adjusted p-values | Summary |
|-----------|--------------------------------|---------------|---------------------------|---------------------------|-------------------|---------|
| Fig 1B    | Kruskal-Wallis test            | 6<br>(nmel=5) | All strains               | 29.29<br>(Kruskal-Wallis) | <0.0001           | **      |
| Fig 1B    | Dunn's multiple comparison     | 6,5           | Ovispirin vs. Melittin    |                           | 0.0006            | **      |
|           |                                | 6,6           | Ovispirin vs. Temporin A  |                           | >0.9999           | ns      |
|           |                                | 6,6           | Ovispirin vs. Aurein 1.2  |                           | >0.9999           | ns      |
|           |                                | 6,6           | Ovispirin vs. Pexiganan   |                           | 0.7442            | ns      |
|           |                                | 6,6           | Ovispirin vs. Pardaxin    |                           | 0.0122            | *       |
|           |                                | 5,6           | Melittin vs. Temporin A   |                           | 0.028             | *       |
|           |                                | 5,6           | Melittin vs. Aurein 1.2   |                           | 0.0006            | **      |
|           |                                | 5,6           | Melittin vs. Pexiganan    |                           | 0.3864            | ns      |
|           |                                | 5,6           | Melittin vs. Pardaxin     |                           | >0.9999           | ns      |
|           |                                | 6,6           | Temporin A vs. Aurein 1.2 |                           | >0.9999           | ns      |
|           |                                | 6,6           | Temporin A vs. Pexiganan  |                           | >0.9999           | ns      |
|           |                                | 6,6           | Temporin A vs. Pardaxin   |                           | 0.3135            | ns      |
|           |                                | 6,6           | Aurein 1.2 vs. Pexiganan  |                           | 0.7442            | ns      |
|           |                                | 6,6           | Aurein 1.2 vs. Pardaxin   |                           | 0.0122            | *       |
|           |                                | 6,6           | Pexiganan vs. Pardaxin    |                           | >0.9999           | ns      |
| Fig S1-B  | MWU with Bonferroni correction | 6,6           | Temporin vs. Melittin     | 0                         | 0.0066            | **      |
|           |                                | 6,6           | Pexiganan vs. Melittin    | 0                         | 0.0066            | **      |
|           |                                | 6,6           | Pexiganan vs. Temporin    | 3.5                       | 0.0456            | *       |
| Fig 2 D-F | MWU with Bonferroni correction | 6,6           | Temp+Mel vs. Temp         | 2                         | 0.0216            | *       |
|           |                                | 6,6           | Temp+Mel vs. Mel          | 3                         | 0.026             | *       |
|           |                                | 6,6           | Temp+Pex vs. Temp         | 0                         | 0.013             | *       |
|           |                                | 6,6           | Temp+Pex vs. Pex          | 2                         | 0.0044            | **      |

|           |                                |       |                        |     |         |    |
|-----------|--------------------------------|-------|------------------------|-----|---------|----|
|           |                                | 6,6   | Mel+Pex vs. Mel        | 0   | 0.0044  | ** |
|           |                                | 6,6   | Mel+Pex vs. Pex        | 0   | 0.0044  | ** |
| Fig 3     | MWU with Bonferroni correction | 6,6   | Mel vs. Pex+Mel        | 0   | 0.0044  | ** |
|           |                                | 6,6   | Mel vs. Temp+Mel       | 2   | 0.0174  | *  |
|           |                                | 6,6   | Pex vs. Pex+Mel        | 2.5 | 0.0216  | *  |
|           |                                | 6,6   | Pex vs. Pex+Temp       | 0.5 | 0.0086  | ** |
|           |                                | 6,6   | Temp vs. Mel+Temp      | 7   | 0.1212  | ns |
|           |                                | 6,6   | Temp vs. Pex+Temp      | 0   | 0.0044  | ** |
| Fig 4A    | Dunn's multiple comparison     | 6,6   | Ancestor vs. Temporin  |     | 0.6585  | ns |
| Lagtime   |                                | 6,5   | Ancestor vs. Melittin  |     | 0.0078  | ** |
|           |                                | 6,5   | Ancestor vs. Pexiganan |     | 0.3323  | ns |
|           |                                | 6,6   | Ancestor vs. NPSA      |     | >0.9999 | ns |
| Fig 4B    | Dunn's multiple comparison     | 6,6   | Ancestor vs. Temporin  |     | >0.9999 | ns |
| Vmax      |                                | 6,5   | Ancestor vs. Melittin  |     | 0.0057  | ** |
|           |                                | 6,5   | Ancestor vs. Pexiganan |     | 0.0004  | ** |
|           |                                | 6,6   | Ancestor vs. NPSA      |     | 0.0873  | ns |
| Fig S2    | Dunn's multiple comparison     | 6,6   | Ancestor vs. Temporin  |     | >0.9999 | ns |
| T at Vmax |                                | 6,5   | Ancestor vs. Melittin  |     | 0.0118  | *  |
|           |                                | 6,5   | Ancestor vs. Pexiganan |     | 0.4823  | ns |
|           |                                | 6,6   | Ancestor vs. NPSA      |     | 0.7347  | ns |
| Fig S3    | Dunn's multiple comparison     | 6,6   | Ancestor vs. Temporin  |     | >0.9999 | ns |
| AUC       |                                | 6,5   | Ancestor vs. Melittin  |     | 0.05    | *  |
|           |                                | 6,5   | Ancestor vs. Pexiganan |     | 0.0095  | ** |
|           |                                | 6,6   | Ancestor vs. NPSA      |     | >0.9999 | ns |
| Fig 5     | Fisher's exact test            | 12,12 | Pexiganan vs. Temporin |     | 0.0003  | ** |
| Fig 6B    | MWU with Bonferroni correction | 6,6   | FK vs. Pex + Temp      | 0   | 0.0044  | ** |
|           |                                | 6,6   | FK vs. Pex + Mel       | 0   | 0.0044  | ** |

Statistical analysis performed using GraphPad Prism 7.02. \* p<0.05, \*\* p<0.01

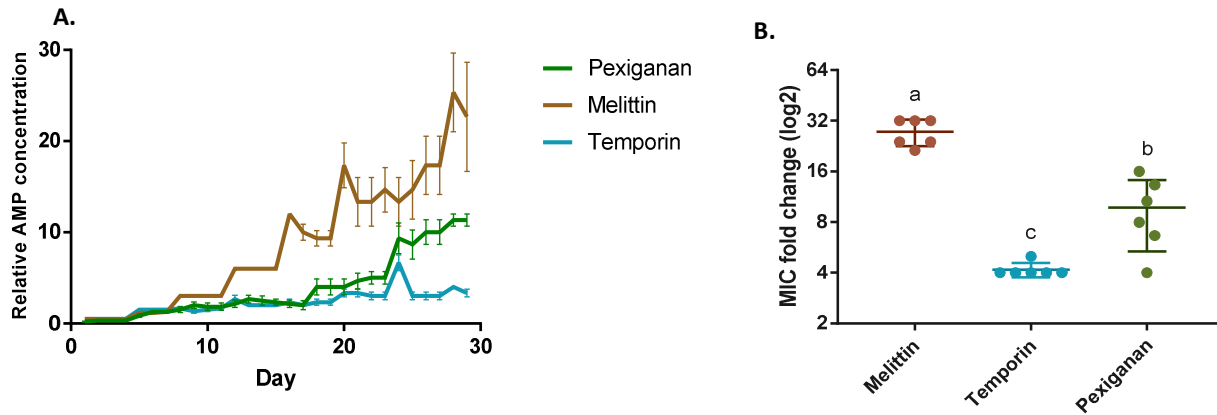

**Fig S1. Combination of AMPs can hinder the evolution of resistance.** (A) Relative concentration of individual AMPs through the experimental evolution (combination experiment). (B) Resistance of the individual-AMP evolved strains (MWU with Bonferroni correction, a-c represent significant differences between groups). (n=6, Growth defined as  $OD_{595} > 0.3$ ). The MIC determined towards the AMP it evolved with. Each bar represents the mean of six lines + SEM. \*  $p < 0.05$ , \*\*  $p < 0.01$  (Mann-Whitney U test with Bonferroni correction).

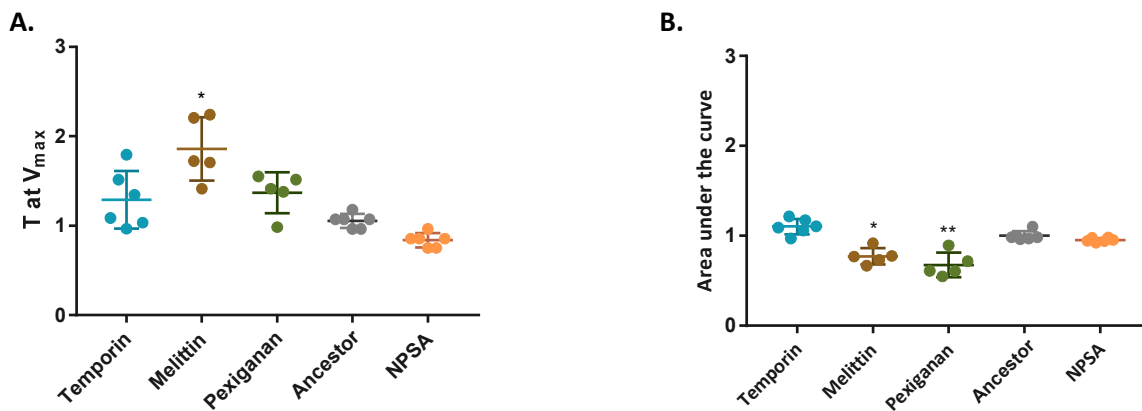

**Fig S2. Fitness cost of evolved strains.** Determination of fitness cost performed by growing the bacteria in the absence of AMPs.  $OD_{595}$  was measured every 15 min through 24 hours. (A) Time to achieve maximal growth rate ( $V_{max}$ ). (B) Area under the curve. Values were calculated by plate reader software (Gen 5 and normalized to ancestor strain values). Each dot represents mean of triplicate, bars represent mean  $\pm$  SD ( $n_{melittin, pexiganan}=5$ , Dunn's multiple comparison refed to ancestor strain, \*  $p < 0.05$ , \*\*  $p < 0.01$ ). NPSA- evolved strain without AMPs. The results represent three independent experiments.

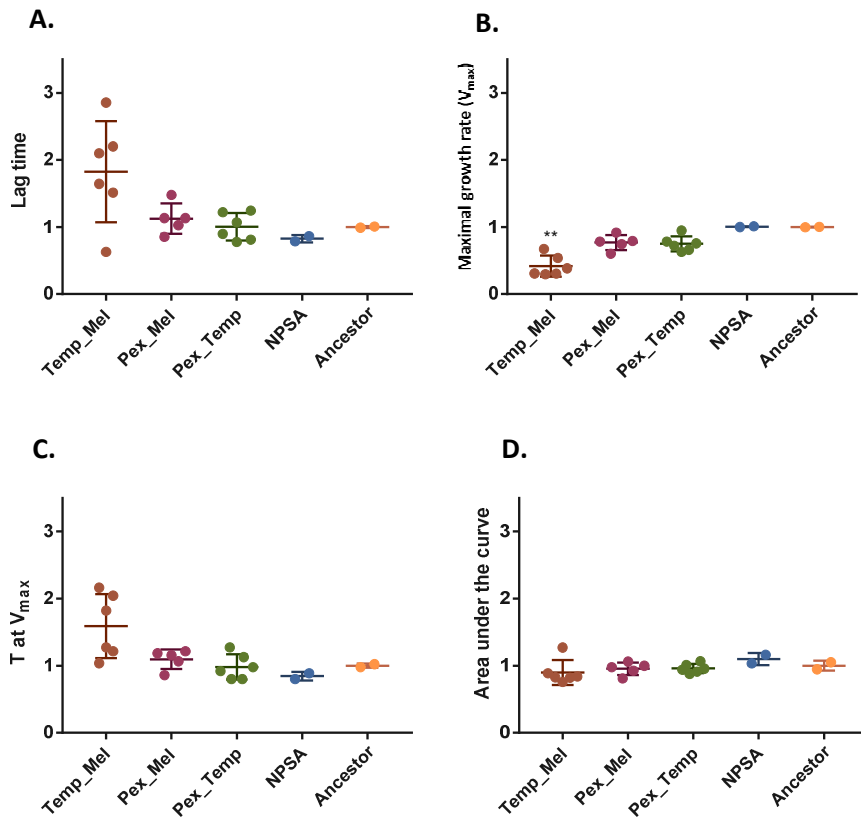

**Fig S3. Fitness cost of AMP-combinations evolved strains.** Determination of fitness cost performed by growing the bacteria in the absence of AMPs.  $OD_{595}$  was measured every 15 min through 24 hours. (A) Lag time, (B) maximal growth rate ( $V_{max}$ ), (C) time at  $V_{max}$ , (D) area under the curves. A-C values were calculated by plate reader software (Gen 5 and normalized to ancestor strain values). Each dot represents mean of triplicate, bars represent mean  $\pm$  SD (n=6, Dunn's multiple comparison refed to ancestor strain, \*\* p < 0.01). NPSA- evolved strain without AMPs. The results represent three independent experiments.

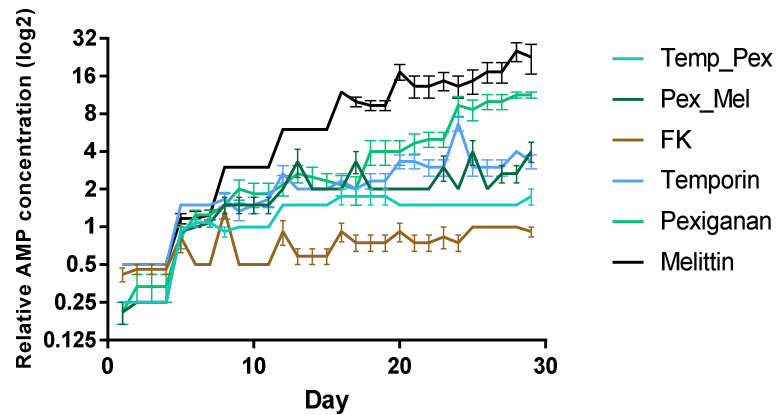

**Fig S4. Random peptides mixture composed of phenylalanine and lysine (FK) delays the evolution of resistance.** Relative AMP concentration through the evolution. The concentrations are normalized to the initial MIC. Bars represent the mean + SEM.

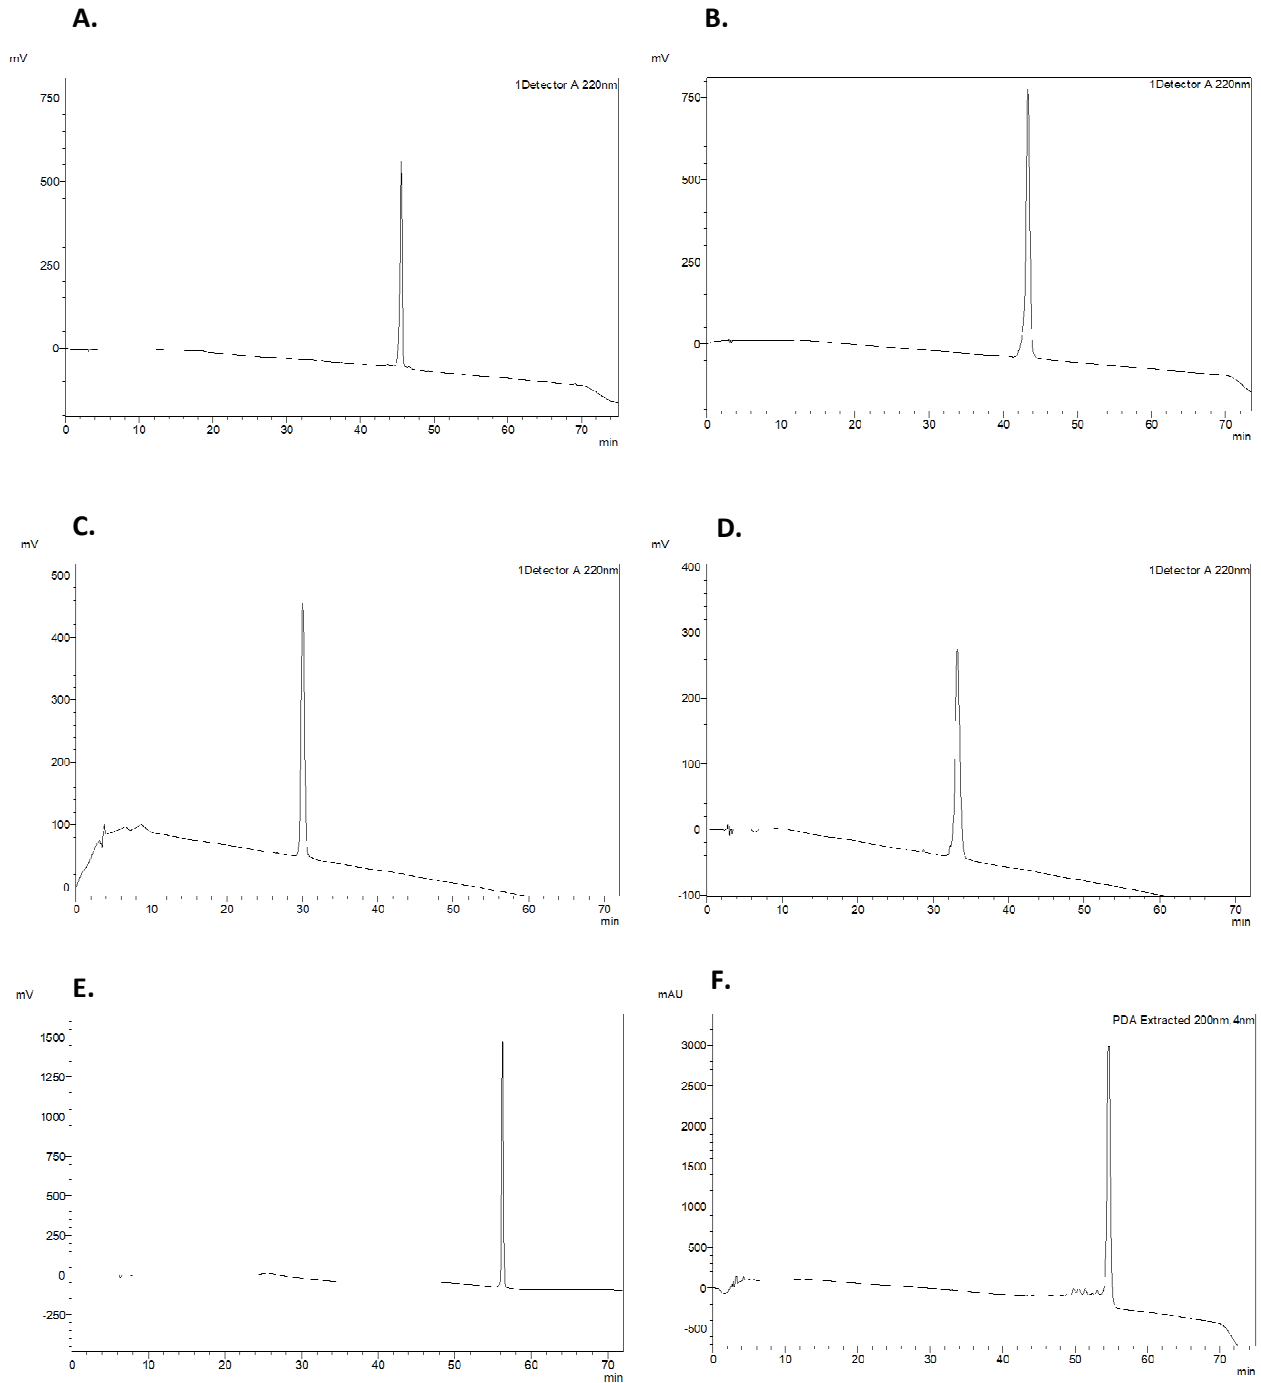

**Fig S5. HPLC chromatograms of purified AMPs.** The purification chromatograms of AMPs using reverse-phase high-performance liquid chromatography (HPLC). (A) Temporin, (B) melittin, (C) pexiganan, (D) ovispirin, (E) aurein, (F) pardaxin. The purified AMP dissolved in 20% acetonitrile, then injected to a gradient of 5 to 65 percent acetonitrile with increment of 0.5% in a minute.
